# Supplementary material for: Neonates in Ahmedabad, India, during the 2010 Heat Wave: A Climate Change Adaptation Study
Source: Hindawi journal article supplement (doi:10.1155/2014/946875), 2014-01-01
Supplement: f1 [file 946875.f1.pdf]

## Annex 1

Details of literature review initially performed October 2011 and updated January 2013.

|                |                                                                                                                                                                                                              |
|----------------|--------------------------------------------------------------------------------------------------------------------------------------------------------------------------------------------------------------|
| Search terms   | Infant, neonate, newborn, low birth weight, premature birth, child, prenatal exposure, heat, ambient temperature, hot temperature, heat stress disorder, body temp changes, skin temperature, climate change |
| Search engines | Pubmed, Scopus, Web of Science, Google Scholar                                                                                                                                                               |
